# Supplementary material
Source: publisher site journal article supplement (https://www.dovepress.com/article/484458)
Supplement: Supplementary file 1 [file get_supplementary_file.php]

**Supplementary Table 1. Comparisons of P1 component parameters in alerting network**

|  |  | Non-OSA  n=21 | Mild OSA  n=49 | Moderate to Severe OSA  n=17 | F/Z | *P* |
| --- | --- | --- | --- | --- | --- | --- |
| Parameter | Electrode |  |  |  |  |  |
| Average amplitude | P3 | 0.46(-3.13,3.02) | -1.4(-3.48,1.14) | -1.31(-1.85,2.91) | 1.673 | 0.433 |
| PZ | 0.58±3.00 | -0.71±3.60 | 0.54±3.03 | 1.532 | 0.222 |
| P4 | 1.13±4.84 | -0.59±4.90 | 1.45±3.89 | 1.708 | 0.187 |
| O1 | 1.68(-4.12,3.15) | -2.63(-5.18,0.46) | 1.32(-3.93,4.37) | 3.954 | 0.138 |
| OZ | 0.08(-3.92,3.2) | -2.13(-4.89,1.39) | 2.47(-2.55,5.03) | 3.863 | 0.145 |
| O2 | -0.44(-4.67,4.38) | -1.07(-3.64,3.33) | 3.31(-2.86,6.38) | 1.034 | 0.596 |
| Maximum amplitude | P3 | 2.51±5.55 | 2.40±4.25 | 2.13±3.77 | 0.037 | 0.964 |
| PZ | 3.12±3.01 | 2.06±4.10 | 3.49±3.00 | 1.229 | 0.298 |
| P4 | 4.60±4.67 | 2.88±5.27 | 3.95±3.80 | 0.998 | 0.373 |
| O1 | 5.07(1.13,8.12) | 1.59(-1.1,5.7) | 4.96(-1.14,9.31) | 3.110 | 0.211 |
| OZ | 3.98(1.54,7.03) | 1.87(-1.61,7.9) | 4.98(0.88,10.94) | 2.664 | 0.264 |
| O2 | 4.94(0.49,7.86) | 3.19(-0.97,8.85) | 5.77(1.24,11.79) | 1.366 | 0.211 |
| Latency | P3 | 130(105,75) | 140(100,175) | 160(110,180) | 2.327 | 0.312 |
| PZ | 130(100,200) | 140(105,170) | 170(125,190) | 4.751 | 0.093 |
| P4 | 130(105,195) | 140(110,195) | 170(140,180) | 2.263 | 0.322 |
| O1 | 150(100,180) | 140(100,170) | 160(120,185) | 1.595 | 0.450 |
| OZ | 130(100,190) | 160(110,180) | 160(120,190) | 2.529 | 0.282 |
| O2 | 110(100,190) | 140(115,175) | 170(145,180) | 5.399 | 0.067 |
| P3: left parietal electrode; PZ: midline parietal electrode; P4: right parietal electrode; O1: left occipital electrode, OZ: midline occipital electrode; O2: right occipital electrode. | | | | | | |

**Supplementary Table 2. Comparisons of P1 component parameters in orienting network**

|  |  | Non-OSA  n=21 | Mild OSA  n=49 | Moderate to Severe OSA  n=17 | F/Z | P |
| --- | --- | --- | --- | --- | --- | --- |
| Parameter | Electrode |  |  |  |  |  |
| Average amplitude | P3 | -0.09(-2.45,3.57) | 0.68(-1.43,1.99) | 0.4(-0.57,1.92) | 0.342 | 0.843 |
| PZ | 0.24±3.34 | -0.00±2.94 | 0.59±3.78 | 0.219 | 0.804 |
| P4 | -0.35±4.32 | -0.57±5.18 | 0.96±3.24 | 0.682 | 0.508 |
| O1 | 1.24(-2.1,4.71) | 1.26(-4.3,5.36) | 2.84(-2.44,7.2) | 0.504 | 0.777 |
| OZ | 1.06(-2.48,4.52) | 0.03(-3.92,4.62) | 2.6(-3.39,6.39) | 0.413 | 0.813 |
| O2 | 2.05(-2.61,5.55) | -0.36(-6.26,5.67) | 1.51(-5.18,6.65) | 0.801 | 0.670 |
| Maximum amplitude | P3 | 4.68(0.88,7.03) | 3.27(1,6.22) | 3.17(1.92,5.41) | 0.560 | 0.756 |
| PZ | 4.13(0.01,5.51) | 2.87(0.85,3.91) | 3.15(0.7,5.47) | 0.935 | 0.626 |
| P4 | 3.39±5.05 | 3.375.81 | 4.023.46 | 0.105 | 0.900 |
| O1 | 5(1.42,10.79) | 4.76(-0.4,9.01) | 5.59(1.36,11.05) | 0.496 | 0.780 |
| OZ | 5.31(-1.01,9.03) | 3.76(0.26,9.65) | 7.67(0.75,11.61) | 0.92 | 0.631 |
| O2 | 6.44(3.04,9.84) | 3.42(-1.29,10.14) | 6.12(-1.42,11.41) | 0.855 | 0.652 |
| Latency | P3 | 170(130,190) | 160(130,190) | 160(130,190) | 0.014 | 0.993 |
| PZ | 160(120,190) | 140(110,185) | 160(130,180) | 2.931 | 0.231 |
| P4 | 140(130,195) | 140(100,190) | 180(140,180) | 5.028 | 0.081 |
| O1 | 160(125,195) | 140(110,195) | 150(110,185) | 2.601 | 0.272 |
| OZ | 170(125,185) | 130(100,190) | 140(100,180) | 2.846 | 0.241 |
| O2 | 170(140,185) | 130(100,195)* | 130(110,175) | 6.921 | 0.031 |
| P3: left parietal electrode; PZ: midline parietal electrode; P4: right parietal electrode; O1: left occipital electrode, OZ: midline occipital electrode; O2: right occipital electrode.  Compared with non-OSA group, **P* < 0.05 | | | | | | |

**Supplementary Table 3. Comparisons of P3/N3 component parameters in executive control network**

|  |  | Non-OSA  n=21 | Mild OSA  n=49 | Moderate to Severe OSA  n=17 | Z | *P* |
| --- | --- | --- | --- | --- | --- | --- |
| Parameter | Electrode |  |  |  |  |  |
| Average amplitude | FZ | -0.95(-2.75,0.37) | -0.16(-2.48,1.69) | 2.37(-0.58,5.17)*# | 9.217 | 0.01 |
| FCZ | -0.35(-2.84,0.75) | -0.24(-2.69,0.72) | 0.96(-1.14,4.32) | 3.751 | 0.153 |
| CZ | 0.23(-1.92,1.44) | -0.35(-2.62,1.2) | -0.94(-1.79,2.86) | 0.875 | 0.646 |
| PZ | 1.17(-0.91,2.15) | 0.15(-1.64,2.39) | -0.94(-3.51,1.37) | 1.86 | 0.395 |
| Maximum amplitude | FZ | -3.99(-6.69,-1.91) | -3.56(-6.4,-1.38) | -0.3(-3.13,1.6)*# | 9.373 | 0.009 |
| FCZ | -4.06(-6.33,-1.62) | -3.54(-6.52,-1.43) | -0.97(-5.72,1.54) | 3.766 | 0.152 |
| CZ | -2.79(-3.96,-1.35) | -2.98(-5.8,-1.44) | -2.55(-5.11,-0.13) | 0.554 | 0.758 |
| PZ | 2.99(1.84，5.72) | 2.85(0.47，4.79) | 1.46(-1，4.52) | 1.665 | 0.435 |
| Latency | FZ | 370(340,440) | 420(345,480) | 410(325,480) | 2.254 | 0.324 |
| FCZ | 390(340,450) | 420(330,470) | 360(330,400) | 2.876 | 0.237 |
| CZ | 380(320,460) | 430(340,485) | 360(345,410) | 4.106 | 0.128 |
| PZ | 360(310,390) | 330(270,385) | 300(255,390) | 0.99 | 0.376 |
| FZ: midline frontal electrode; FCZ: midline central frontal electrode; CZ: midline central electrode; PZ: midline parietal electrode.  P3 component for PZ electrode; N3 component for FZ, FCZ and CZ electrodes.  Compared with non-OSA group, **P* < 0.05  Compared with mild OSA group, #P < 0.05 | | | | | | |

**Supplementary Table 4. Comparisons of time-frequency results in alerting network**

|  |  | Non-OSA  n=21 | Mild OSA  n=49 | Moderate to Severe OSA  n=17 | Z | *P* |
| --- | --- | --- | --- | --- | --- | --- |
| Frequency band | Electrode |  |  |  |  |  |
| delta | P3 | -0.24(-0.8,0.42) | -0.18(-1.06,0.44) | -0.35(-0.6,0.78) | 0.425 | 0.809 |
|  | PZ | -0.11(-0.54,0.66) | -0.07(-0.94,0.46) | 0.01(-0.7,0.72) | 0.574 | 0.750 |
|  | P4 | -0.27(-0.87,0.46) | -0.05(-1.09,1.02) | -0.49(-1.14,0.14) | 2.588 | 0.274 |
|  | O1 | -0.29(-1.36,1.68) | -0.89(-3,0.91) | 0.27(-2.06,4.54) | 2.778 | 0.249 |
|  | OZ | 0.06(-0.77,1.32) | -0.47(-3.02,1.49) | 0.13(-1.87,4.3) | 2.558 | 0.278 |
|  | O2 | 0.37(-1.78,2.02) | -1.21(-3.53,1.47) | -0.33(-2.04,9.63) | 1.858 | 0.395 |
| theta | P3 | -0.2(-2.3,2.45) | 0.07(-1.55,1.48) | -0.64(-1.44,1.89) | 0.075 | 0.963 |
|  | PZ | -0.2(-1,0.65) | 0.07(-1.53,1.37) | 0.15(-1.27,0.89) | 0.084 | 0.959 |
|  | P4 | -0.49(-2.66,0.87) | 1.09(-1.62,2.25) | -0.34(-5.05,0.44) | 5.743 | 0.057 |
|  | O1 | -0.25(-3.83,4.46) | -0.74(-4.01,3.54) | -0.02(-8.44,1.44) | 0.307 | 0.858 |
|  | OZ | -0.4(-3.45,5.08) | -0.04(-4.55,3.61) | 0.78(-8.38,1.64) | 0.258 | 0.879 |
|  | O2 | -0.83(-3.52,9.85) | 0.09(-5.02,5.7) | 1.35(-7.79,2.71) | 0.129 | 0.938 |
| alpha | P3 | -0.28(-2.68,3.66) | 0.06(-1.33,2.31) | 0.21(-1.15,1.46) | 0.185 | 0.912 |
|  | PZ | 0.23(-1.76,1.74) | 0.1(-1.85,1.17) | 0.13(-3.22,2.86) | 0.22 | 0.896 |
|  | P4 | -1.6(-3.53,3.2) | 0(-2.54,3.54) | -0.06(-2.13,2.01) | 0.515 | 0.773 |
|  | O1 | -1.09(-3.32,4.36) | -1.89(-7.85,2.76) | 0.2(-3.72,5.9) | 2.307 | 0.315 |
|  | OZ | -0.99(-2.97,1.52) | -1.19(-7.59,2.25) | 0.38(-4.18,6.5) | 1.501 | 0.472 |
|  | O2 | -0.65(-3.2,5.86) | -1.25(-5.21,4.84) | 0.54(-4,8.32) | 0.593 | 0.744 |
| low beta | P3 | 0.16(-1.78,1.46) | 0.14(-1.02,0.67) | 0.66(-0.58,1.17) | 1.955 | 0.376 |
|  | PZ | -0.16(-0.78,1.4) | -0.01(-0.88,1.16) | 0.37(-0.19,1.61) | 1.51 | 0.470 |
|  | P4 | -0.14(-0.95,0.83) | 0.03(-1.34,1.72) | -0.16(-0.33,0.3) | 0.137 | 0.934 |
|  | O1 | 0.28(-2.87,2.76) | 0.33(-3.6,3.46) | 0.25(-1.3,1.97) | 0.181 | 0.914 |
|  | OZ | -0.8(-2.52,2.9) | 0.28(-2.26,4.93) | 0.91(-0.57,2.82) | 1.269 | 0.530 |
|  | O2 | -0.04(-2.59,4.06) | 0.39(-1.95,4.31) | 0.75(-1.71,2.84) | 0.283 | 0.868 |
| beta | P3 | -0.24(-0.63,0.63) | -0.01(-0.44,0.51) | 0.1(-0.2,0.33) | 0.831 | 0.660 |
|  | PZ | -0.26(-0.6,0.09) | 0.07(-0.3,0.69) | 0.16(-0.3,0.35) | 4.138 | 0.126 |
|  | P4 | 0.1(-0.34,0.59) | 0.23(-0.38,1.3) | 0.02(-0.44,0.35) | 2.535 | 0.282 |
|  | O1 | -0.47(-1.15,1.55) | 0.22(-0.67,1.73) | -0.05(-0.79,0.83) | 1.624 | 0.444 |
|  | OZ | -0.29(-0.96,1.07) | 0.36(-0.34,1.93) | -0.2(-1.07,0.86) | 2.026 | 0.363 |
|  | O2 | 0.11(-1.14,0.91) | 0.54(-0.23,2.26) | -0.37(-1.39,0.71) | 4.998 | 0.082 |
| high beta | P3 | -0.35(-0.62,0.53) | 0.11(-0.46,0.63) | -0.01(-0.4,0.44) | 1.36 | 0.507 |
|  | PZ | -0.29(-0.69,-0.03) | 0.07(-0.2,0.62)* | 0.05(-0.48,0.32) | 7.777 | 0.02 |
|  | P4 | -0.06(-0.5,0.34) | 0.34(-0.23,0.87) | 0.02(-0.43,0.37) | 4.737 | 0.094 |
|  | O1 | -0.48(-1.22,1.2) | 0.29(-0.73,1.41) | -0.56(-1.38,0.59) | 5.087 | 0.079 |
|  | OZ | -0.04(-0.78,0.86) | 0.34(-0.15,1.48) | -0.58(-1.6,0.6) | 6.037 | 0.049 |
|  | O2 | -0.07(-1.36,1.22) | 0.56(-0.36,1.73) | -0.74(-2,0.12)# | 10.79 | 0.005 |
| gamma | P3 | 0.01(-0.18,0.17) | 0.01(-0.15,0.12) | -0.03(-0.29,0.25) | 0.119 | 0.942 |
|  | PZ | -0.04(-0.54,0.07) | 0.02(-0.08,0.15) | -0.03(-0.28,0.21) | 3.629 | 0.163 |
|  | P4 | 0.11(-0.22,0.3) | 0.08(-0.1,0.25) | -0.15(-0.55,0.12) | 5.396 | 0.067 |
|  | O1 | 0.01(-0.35,0.57) | 0.09(-0.36,0.45) | 0(-1.09,0.34) | 1.116 | 0.572 |
|  | OZ | -0.05(-0.36,0.77) | -0.09(-0.59,0.29) | -0.03(-0.38,0.23) | 1.434 | 0.488 |
|  | O2 | 0.01(-0.35,0.5) | 0.04(-0.36,0.27) | -0.2(-1.07,0.29) | 1.091 | 0.579 |
| P3: left parietal electrode; PZ: midline parietal electrode; P4: right parietal electrode; O1: left occipital electrode, OZ: midline occipital electrode; O2: right occipital electrode.  Compared with non-OSA group, **P* < 0.05  Compared with mild OSA group, #*P* < 0.05 | | | | | | |

**Supplementary Table 5. Comparisons of time-frequency results in orienting network**

|  |  | Non-OSA  n=21 | Mild OSA  n=49 | Moderate to Severe OSA  n=17 | Z | *P* |
| --- | --- | --- | --- | --- | --- | --- |
| Frequency band | Electrode |  |  |  |  |  |
| delta | P3 | 0.29(-0.67,0.94) | 0.23(-0.72,1.11) | 0.33(-0.47,0.68) | 0.125 | 0.940 |
|  | PZ | 0(-0.41,0.52) | 0.03(-0.54,1.03) | 0(-0.41,0.35) | 0.371 | 0.831 |
|  | P4 | 0.25(-0.14,1.47) | 0.4(-0.73,1.24) | -0.27(-0.84,0.96) | 2.487 | 0.288 |
|  | O1 | 0.03(-1.27,2.11) | 0.05(-1.54,1.3) | 0.68(-0.89,3.17) | 1.300 | 0.522 |
|  | OZ | 0.01(-0.93,1.51) | 0.29(-1.44,1.57) | 0.59(-0.35,3.85) | 1.337 | 0.512 |
|  | O2 | 0.18(-1.84,3.84) | 0.45(-2.12,2.38) | 0.97(-0.62,7.85) | 1.457 | 0.483 |
| theta | P3 | 0.59(-0.64,4.1) | 0.75(-1.62,1.92) | -0.11(-3.54,0.57) | 4.703 | 0.095 |
|  | PZ | -0.06(-2.37,0.91) | 0.84(-1.22,1.92) | 0.02(-2.48,0.85) | 2.410 | 0.300 |
|  | P4 | -0.03(-1.88,5.55) | 0.68(-2.06,4.47) | -0.45(-3.19,0.65) | 1.321 | 0.517 |
|  | O1 | 0.18(-3.45,5.16) | -0.81(-3.67,3.9) | 0.41(-5.79,6.17) | 0.144 | 0.931 |
|  | OZ | -0.92(-3.86,3.35) | 0.21(-6.97,3.12) | -0.06(-3.85,8.56) | 0.931 | 0.628 |
|  | O2 | 0.48(-6.87,12.11) | -0.48(-7.04,4.28) | 2.18(-2.49,11.11) | 1.719 | 0.423 |
| alpha | P3 | 0.71(-1.12,3.35) | -0.46(-2.46,1.67) | -0.13(-1.83,0.92) | 2.127 | 0.345 |
|  | PZ | -0.25(-1.99,0.41) | 0.28(-2.42,1.53) | -0.33(-2.44,0.89) | 1.012 | 0.603 |
|  | P4 | 0.16(-4.51,2.45) | -0.16(-2.85,2.25) | -1.72(-3.91,-0.15) | 2.270 | 0.321 |
|  | O1 | 0.62(-4.04,6.43) | -0.69(-6.28,5.29) | -0.88(-7.12,3.58) | 1.351 | 0.509 |
|  | OZ | 0.37(-2.86,4.28) | -0.01(-5.47,3.26) | -0.29(-6.96,2.98) | 0.874 | 0.646 |
|  | O2 | 0.51(-4.12,6.4) | 0.09(-6.44,3.2) | -1.15(-4.02,1.23) | 1.816 | 0.403 |
| low beta | P3 | 0.25(-2.11,1.69) | 0(-1.22,1.02) | 0.07(-1.26,1.16) | 0.111 | 0.946 |
|  | PZ | 0.13(-0.75,0.88) | -0.02(-0.77,1.12) | 0.54(-0.84,1.18) | 0.487 | 0.784 |
|  | P4 | -0.01(-1.83,0.74) | 0.07(-1.11,2) | -0.38(-1.83,0.63) | 2.595 | 0.273 |
|  | O1 | 0.65(-2.07,4.06) | 0.05(-2.83,2.2) | -1.43(-2.96,0.32) | 3.066 | 0.216 |
|  | OZ | 0.42(-1.03,3.33) | -0.2(-2.46,2.17) | -0.92(-3.01,0.39) | 2.355 | 0.308 |
|  | O2 | 0.22(-2.12,3.31) | -0.41(-2.11,0.75) | -1.06(-2.8,0.97) | 0.670 | 0.716 |
| beta | P3 | 0.38(-0.29,1) | 0.09(-0.55,0.62) | 0.15(-0.1,0.68) | 0.975 | 0.614 |
|  | PZ | 0.17(-0.03,0.71) | -0.03(-0.42,0.39) | 0.14(-0.21,0.28) | 3.356 | 0.187 |
|  | P4 | -0.19(-0.69,0.4) | 0.11(-0.61,0.69) | -0.07(-1.02,0.36) | 1.620 | 0.445 |
|  | O1 | -0.11(-0.99,2.15) | -0.06(-1.07,1.23) | -0.59(-1.22,-0.1) | 4.600 | 0.100 |
|  | OZ | 0.4(-0.82,1.56) | -0.04(-1.04,0.98) | -0.5(-1.2,0.1) | 3.510 | 0.173 |
|  | O2 | -0.32(-1.25,1.83) | -0.09(-1,0.89) | -0.69(-1.73,0.22) | 0.780 | 0.677 |
| high beta | P3 | 0.35(-0.23,0.77) | 0.06(-0.6,0.58) | 0.17(-0.04,0.62) | 0.755 | 0.685 |
|  | PZ | 0.43(-0.02,0.78) | -0.02(-0.46,0.33) | 0.15(-0.17,0.24) | 5.231 | 0.073 |
|  | P4 | -0.07(-0.83,0.52) | -0.02(-0.52,0.54) | -0.18(-0.79,0.34) | 0.778 | 0.678 |
|  | O1 | 0.4(-0.74,1.65) | -0.06(-0.98,1.12) | -0.22(-1.36,0.21) | 3.255 | 0.196 |
|  | OZ | 0.18(-0.44,1.68) | -0.02(-0.83,1.04) | -0.11(-1.72,0.27) | 2.417 | 0.299 |
|  | O2 | -0.5(-0.78,1.66) | 0.02(-0.79,0.88) | -0.2(-1.28,0.52) | 0.731 | 0.694 |
| gamma | P3 | 0.06(-0.2,0.32) | 0.02(-0.32,0.24) | -0.02(-0.29,0.15) | 0.926 | 0.629 |
|  | PZ | 0.12(-0.17,0.42) | -0.01(-0.19,0.19) | -0.02(-0.1,0.12) | 2.142 | 0.343 |
|  | P4 | -0.09(-0.43,0.21) | 0.02(-0.29,0.53) | -0.02(-0.76,0.19) | 1.218 | 0.544 |
|  | O1 | 0.16(-0.36,0.39) | 0.05(-0.48,0.47) | 0(-0.48,0.46) | 0.137 | 0.934 |
|  | OZ | -0.15(-0.74,0.69) | -0.04(-0.44,0.75) | 0.09(-0.62,0.66) | 0.572 | 0.751 |
|  | O2 | -0.12(-0.52,0.42) | 0.13(-0.35,0.47) | -0.32(-0.98,0.5) | 0.973 | 0.615 |
| FZ: midline frontal electrode; FCZ: midline central frontal electrode; CZ: midline central electrode; PZ: midline parietal electrode. | | | | | | |

**Supplementary Table 6. Comparisons of time-frequency results in executive control network**

|  |  | Non-OSA  n=21 | Mild OSA  n=49 | Moderate to Severe OSA  n=17 | Z | *P* |
| --- | --- | --- | --- | --- | --- | --- |
| Frequency band | Electrode |  |  |  |  |  |
| delta | FZ | 0.02(-1.58,1.69) | -0.22(-0.98,0.82) | -0.03(-1.53,1.61) | 0.44 | 0.803 |
|  | FCZ | 0.02(-0.61,0.5) | -0.16(-1.28,0.72) | -0.07(-1.64,0.95) | 0.077 | 0.962 |
|  | CZ | -0.11(-0.5,0.22) | -0.16(-1.12,1.14) | 0.19(-1.2,1.04) | 0.437 | 0.804 |
|  | PZ | -0.13(-1.28,0.85) | -0.01(-1.23,1.15) | 0.14(-0.47,1.01) | 0.714 | 0.700 |
| theta | FZ | 0.41(-0.56,1.54) | -0.18(-1.71,1.13) | -0.78(-2.25,1.81) | 1.37 | 0.504 |
|  | FCZ | -0.06(-0.98,0.84) | -0.16(-1.95,1.6) | -0.43(-2.34,0.37) | 1.057 | 0.590 |
|  | CZ | -0.2(-1.33,2.32) | -0.25(-1.75,2.26) | -0.33(-2.34,0.76) | 0.98 | 0.613 |
|  | PZ | -1.06(-1.7,0.6) | 0.03(-1.97,1.96) | 0.45(-0.99,2.33) | 2.079 | 0.354 |
| alpha | FZ | -0.08(-1.85,0.98) | -0.38(-1.04,0.97) | -0.16(-1.58,0.5) | 0.274 | 0.872 |
|  | FCZ | -0.02(-1.56,1.9) | -0.12(-1.53,0.96) | -1.06(-2.92,0.19) | 3.242 | 0.198 |
|  | CZ | 0.34(-0.43,2.15) | 0.08(-1.53,1.65) | -0.42(-4.17,0.98) | 3.177 | 0.204 |
|  | PZ | -0.36(-1.11,0.92) | -0.5(-2.18,1.36) | 2.66(-0.73,5.12)# | 6.893 | 0.032 |
| low Beta | FZ | 0.14(-0.55,0.3) | -0.03(-0.77,0.83) | -0.15(-1.58,0.33) | 1.693 | 0.429 |
|  | FCZ | 0.13(-0.4,0.43) | 0.03(-0.69,0.64) | -0.44(-0.85,-0.08) | 4.434 | 0.109 |
|  | CZ | -0.02(-0.56,0.63) | -0.02(-0.96,0.71) | -0.96(-2.64,0.3) | 4.492 | 0.106 |
|  | PZ | 0.11(-0.4,1.07) | -0.18(-0.79,0.61) | 0.54(-0.5,1.53) | 3.524 | 0.172 |
| beta | FZ | 0.13(-1.15,0.5) | -0.17(-0.96,0.63) | -0.11(-1.32,0.28) | 0.818 | 0.664 |
|  | FCZ | 0.13(-0.21,0.66) | -0.09(-0.69,0.4) | -0.13(-0.56,0.18) | 2.833 | 0.243 |
|  | CZ | -0.02(-0.31,0.19) | -0.13(-0.77,0.4) | -0.36(-1.01,0.16) | 3.14 | 0.208 |
|  | PZ | 0.07(-0.19,0.43) | -0.07(-0.31,0.26) | 0.21(-0.02,0.68) | 4.801 | 0.091 |
| high beta | FZ | 0.16(-1.41,0.52) | -0.22(-0.88,0.65) | -0.14(-1.27,0.28) | 0.971 | 0.616 |
|  | FCZ | 0.16(-0.28,0.72) | -0.1(-0.59,0.29) | -0.05(-0.54,0.2) | 2.883 | 0.237 |
|  | CZ | -0.05(-0.21,0.18) | -0.1(-0.76,0.35) | -0.18(-0.89,0.12) | 2.388 | 0.303 |
|  | PZ | -0.02(-0.2,0.43) | -0.05(-0.26,0.25) | 0.12(-0.06,0.5) | 3.574 | 0.167 |
| gamma | FZ | -0.19(-0.36,0.27) | -0.03(-0.43,0.33) | -0.2(-0.47,0.31) | 0.029 | 0.986 |
|  | FCZ | 0.03(-0.3,0.37) | 0.01(-0.4,0.27) | -0.01(-0.37,0.41) | 0.778 | 0.678 |
|  | CZ | 0.05(-0.12,0.43) | -0.02(-0.28,0.19) | -0.11(-0.41,0.08) | 3.085 | 0.214 |
|  | PZ | 0.01(-0.28,0.31) | 0(-0.21,0.11) | 0.03(-0.11,0.26) | 1.656 | 0.437 |
| FZ: midline frontal electrode; FCZ: midline central frontal electrode; CZ: midline central electrode; PZ: midline parietal electrode.  Compared with mild OSA group, #*P* < 0.05 | | | | | | |
